# Supplementary material for: Helical polydiacetylene prepared in the liquid crystal phase using circular polarized ultraviolet light
Source: Royal Society of Chemistry journal article supplement (doi:10.1039/c3cc47245k), 2013-10-29
Supplement: c3cc47245k.pdf [file c3cc47245k.pdf]

# Electronic Supplementary Information (ESI)

## Helical Polydiacetylene Prepared in Liquid Crystal Phase using Circular Polarized Ultraviolet Light

Yangyang Xu, Hao Jiang, Qijin Zhang, Feng Wang,\* and Gang Zou\*

CAS Key Laboratory of Soft Matter Chemistry, Department of Polymer Science and Engineering, Key Laboratory of Optoelectronic Science and Technology in Anhui Province, University of Science and Technology of China, Hefei, Anhui 230026, P. R. China

E-mail: [gangzou@ustc.edu.cn](mailto:gangzou@ustc.edu.cn), [drfwang@ustc.edu.cn](mailto:drfwang@ustc.edu.cn)

### Experimental Section

**Sample preparation.** The HB complex sample was firstly dissolved in  $\text{CHCl}_3$  with the concentration of  $10 \text{ mg} \cdot \text{mL}^{-1}$ . Then monomers films were prepared by spin-coating method on quartz substrates. Before polymerization, the films were kept in room temperature, or heated to  $45^\circ\text{C}$  and  $65^\circ\text{C}$  to confirm that the monomer films were in crystal, liquid crystal, and isotropic phase, respectively. Then the films were polymerized upon the irradiation of CPUL (313 nm), generated using Babinet-Soleil prism from ultra-high pressure mercury lamp. The light intensity was about  $19.4 \text{ mW} \cdot \text{cm}^{-2}$ .

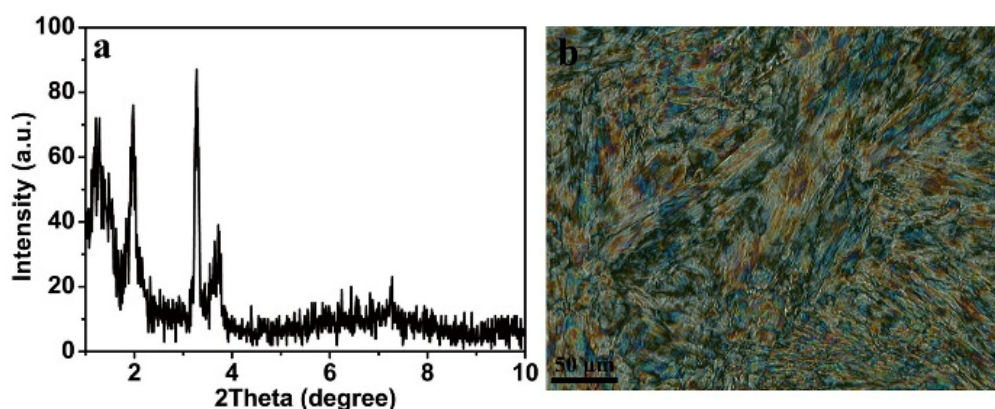

**Fig. S1** (a) Small angle X-ray diffraction and (b) POM texture of the HB complex in crystal phase before polymerization.

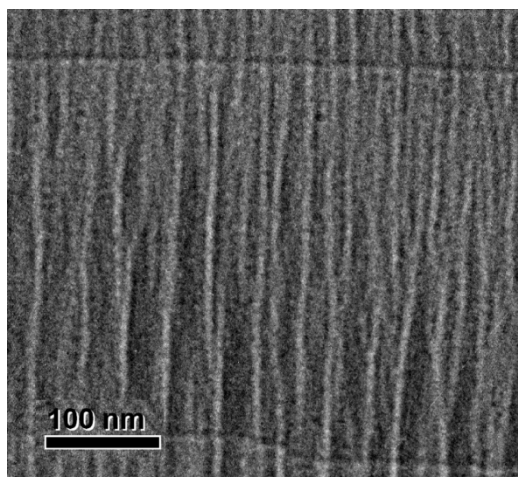

**Fig. S2** TEM image of HB complex monolayer.

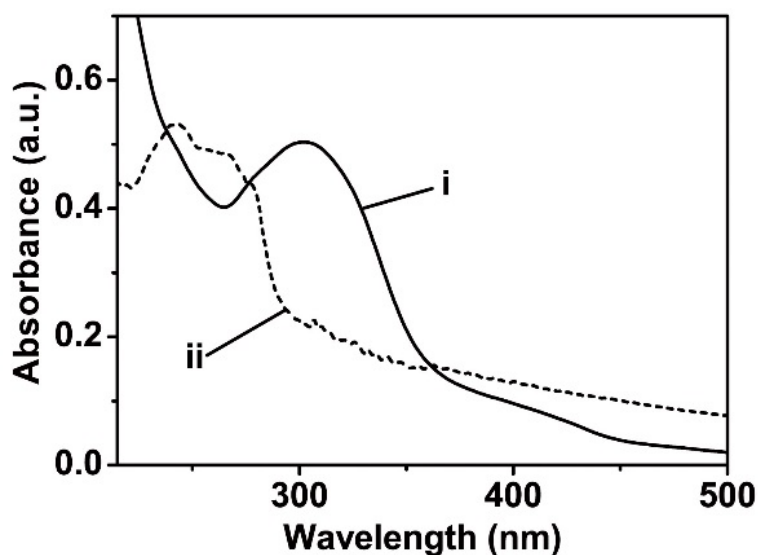

Fig. S3 UV-vis spectra of PCDA/TTB complex: in (i) chloroform solution and (ii) films.

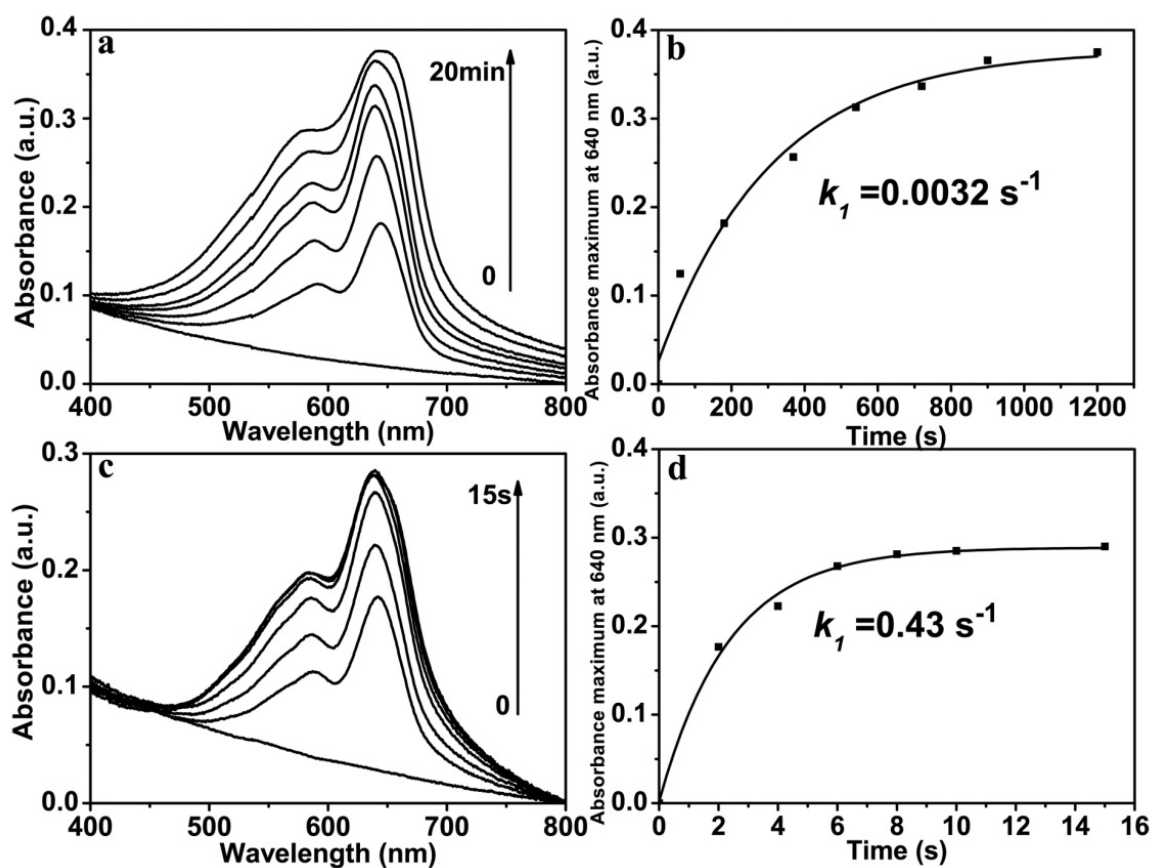

Fig. S4 UV-vis spectra of the HB complex films: (a) in the crystal phase and (c) in the  $L_{Col}$  phase; time-resolved development of absorption maximum at about 640 nm for the HB complex films: (b) in the crystal phase and (d) in the  $L_{Col}$  phase under CPUL irradiation. The irradiation intensity was about  $19.4 \text{ mW cm}^{-2}$ .

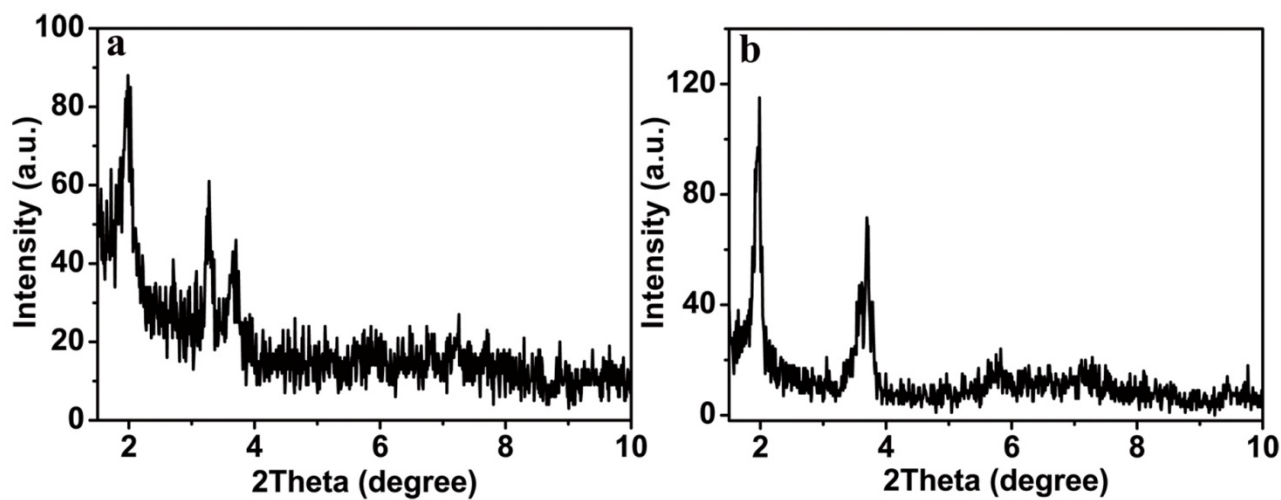

Fig. S5 Small angle X-ray diffraction profile of the HB complex in (a) crystal phase and (b)  $L_{Col}$  phase after polymerization with CPUL.

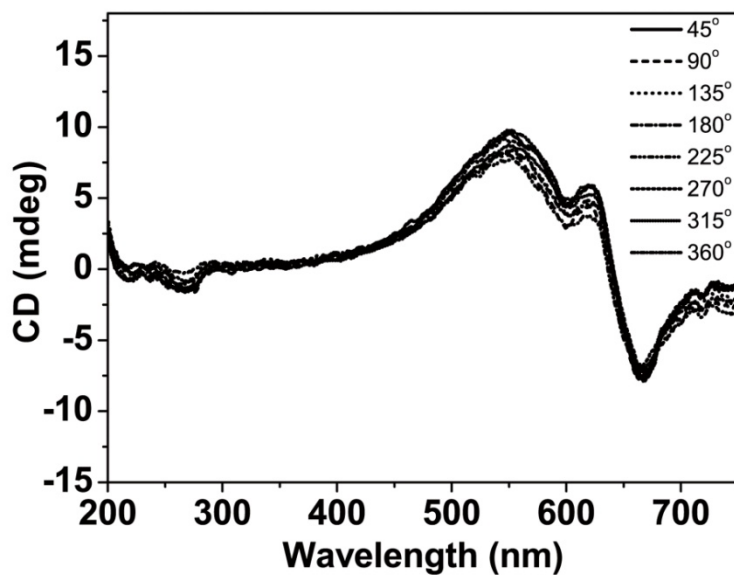

Fig. S6 CD spectra of the sample films rotated as, 45°, 90°, 135°, 180°, 225°, 270°, 315°, and 360°.

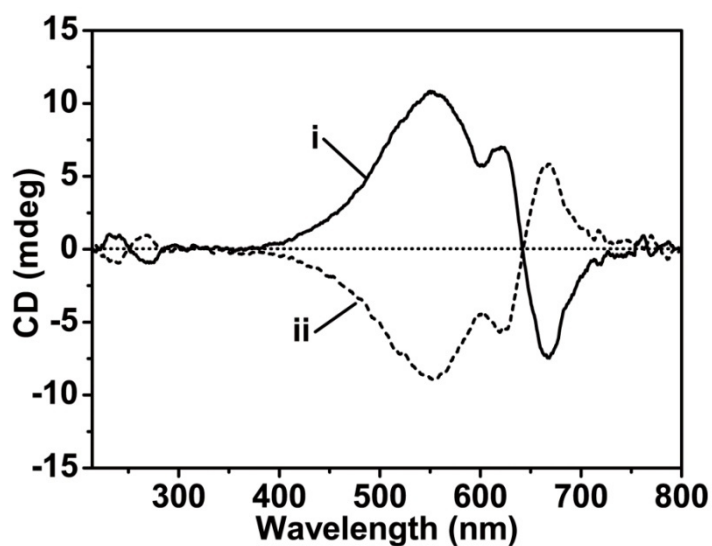

Fig. S7 CD spectra of the HB complex in  $L_{Col}$  liquid crystal phase after irradiation with (i) left-handed and (ii) right-handed CPUL.

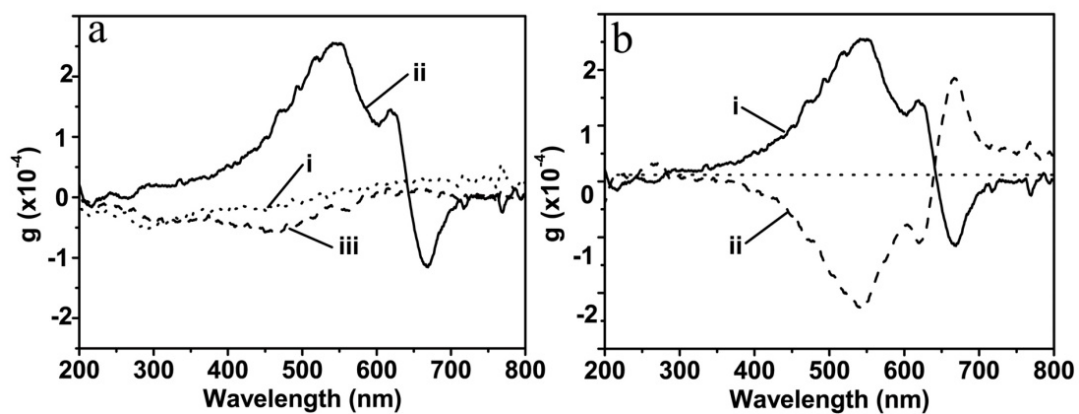

Figure S8. (a) the gabs graph of the HB complex after CPUL irradiation in (i) crystal, (ii) liquid crystal, and (iii) isotropic phase, respectively; (b) the gabs graph of the HB complex after irradiation with (i) left handed CPUL and (ii) right handed CPUL.
